# Supplementary material for: Full Breastfeeding and Allergic Diseases—Long-Term Protection or Rebound Effects?
Source: MDPI journal article supplement (doi:10.3390/nu15122780), 2023-06-16
Supplement: s1 [file s1]

## Supplementary information

**Table S1.** Number of participants during follow-up stratified by eczema during first 3 years <sup>1</sup> and mode of milk feeding in the first 4 months in the intervention cohort and by early eczema and status of full-breastfeeding (FB) in the first 4 months in the non-intervention cohort with family risk of atopy (FH+) and without family risk of atopy (FH-).

|                                   |                            |                | Follow-Up Period at Age [Years] |      |      |       |       |
|-----------------------------------|----------------------------|----------------|---------------------------------|------|------|-------|-------|
|                                   |                            |                | 1–3                             | 5–6  | 7–10 | 11–15 | 16–20 |
| Intervention                      | Early eczema +             |                | 453                             | 385  | 331  | 326   | 274   |
|                                   | Early eczema -             |                | 1208                            | 1076 | 930  | 878   | 759   |
| Non-intervention, FH+             | Early eczema +             |                | 207                             | 170  | 155  | 155   | 115   |
|                                   | Early eczema -             |                | 597                             | 546  | 475  | 454   | 361   |
| Non-intervention, FH-             | Early eczema +             |                | 240                             | 202  | 167  | 165   | 140   |
|                                   | Early eczema -             |                | 1353                            | 1199 | 1006 | 975   | 775   |
| Intervention                      | FB                         | Early eczema + | 200                             | 179  | 156  | 156   | 144   |
|                                   |                            | Early eczema - | 533                             | 491  | 440  | 402   | 358   |
|                                   | CMF <sup>2</sup>           | Early eczema + | 78                              | 69   | 54   | 54    | 37    |
|                                   |                            | Early eczema - | 135                             | 125  | 106  | 105   | 89    |
|                                   | Phf-W <sup>2</sup>         | Early eczema + | 42                              | 29   | 23   | 25    | 19    |
|                                   |                            | Early eczema - | 159                             | 144  | 122  | 121   | 100   |
|                                   | eHF-W <sup>2</sup>         | Early eczema + | 56                              | 49   | 46   | 45    | 32    |
|                                   |                            | Early eczema - | 146                             | 128  | 103  | 102   | 88    |
|                                   | eHF-C <sup>2</sup>         | Early eczema + | 30                              | 28   | 22   | 20    | 17    |
|                                   |                            | Early eczema - | 138                             | 120  | 107  | 100   | 83    |
|                                   | Non-compliant <sup>4</sup> | Early eczema + | 47                              | 31   | 30   | 26    | 25    |
|                                   |                            | Early eczema - | 97                              | 68   | 52   | 48    | 41    |
| Non-intervention <sup>3</sup> FH+ | FB                         | Early eczema + | 102                             | 83   | 79   | 79    | 60    |
|                                   |                            | Early eczema - | 302                             | 280  | 250  | 245   | 205   |
|                                   | Non-FB                     | Early eczema + | 104                             | 86   | 76   | 75    | 54    |
|                                   |                            | Early eczema - | 284                             | 255  | 215  | 199   | 150   |
| Non-intervention <sup>3</sup> FH- | FB                         | Early eczema + | 116                             | 103  | 85   | 84    | 75    |
|                                   |                            | Early eczema - | 633                             | 571  | 501  | 489   | 402   |
|                                   | Non-FB                     | Early eczema + | 116                             | 92   | 76   | 74    | 59    |
|                                   |                            | Early eczema - | 700                             | 610  | 492  | 472   | 361   |

FB: 4 months fully breastfed, FH+: children with a family history of allergies; FH-: children without a family history of allergies; early eczema+: children with eczema up to the 3rd year of life; early eczema-: children without eczema up to the 3rd year of life; <sup>1</sup> defined by parental reported physician's diagnosis; <sup>2</sup> Per protocol population with known status of early eczema; <sup>3</sup> Non-intervention is reduced by patients where FB feeding is unknown (12 in FH+ and 28 in FH-); <sup>4</sup> either received at least one bottle of a formula which was not allowed according to the study protocol or information on the mode were incomplete.

**Table S2.** Cumulative incidence of allergic diseases from birth to 20 years of age for fully breastfed infants in comparison with formula fed infants in the intervention-cohort and in comparison with non-fully breastfed infants with family risk of atopy (FH+) and without family risk of atopy (FH-) in the non-intervention-cohort.

|                      |               |     | <b>Eczema<br/>1st to 3rd Year</b> |             | <b>Eczema<br/>1st to 20th Year</b> |             | <b>Asthma<br/>3rd to 20th Year</b> |             | <b>Allergic Rhinitis/<br/>Hay Fever<br/>4th to 20th Year</b> |             |
|----------------------|---------------|-----|-----------------------------------|-------------|------------------------------------|-------------|------------------------------------|-------------|--------------------------------------------------------------|-------------|
| Intervention         | CMF           | RR  | 0.72                              | (0.55–0.94) | 0.84                               | (0.63–1.10) | 0.92                               | (0.61–1.38) | 0.91                                                         | (0.70–1.20) |
|                      |               | aRR | 0.68                              | (0.52–0.89) | 0.77                               | (0.58–1.02) | 1.01                               | (0.67–1.53) | 0.90                                                         | (0.68–1.18) |
|                      | pHF-W         | RR  | 1.36                              | (0.97–1.92) | 1.32                               | (0.98–1.78) | 0.83                               | (0.55–1.26) | 0.88                                                         | (0.67–1.17) |
|                      |               | aRR | 1.29                              | (0.92–1.83) | 1.30                               | (0.96–1.76) | 0.97                               | (0.64–1.48) | 0.91                                                         | (0.69–1.20) |
|                      | eHF-W         | RR  | 0.99                              | (0.73–1.34) | 1.01                               | (0.76–1.34) | 0.98                               | (0.63–1.52) | 1.04                                                         | (0.78–1.39) |
|                      |               | aRR | 0.98                              | (0.72–1.34) | 1.04                               | (0.77–1.39) | 1.02                               | (0.64–1.64) | 1.06                                                         | (0.79–1.42) |
|                      | eHF-C         | RR  | 1.67                              | (1.12–2.47) | 1.71                               | (1.22–2.40) | 0.94                               | (0.60–1.47) | 0.96                                                         | (0.72–1.28) |
|                      |               | aRR | 1.61                              | (1.08–2.38) | 1.67                               | (1.19–2.36) | 1.07                               | (0.69–1.67) | 0.97                                                         | (0.73–1.29) |
|                      | Non-compliant | RR  | 0.93                              | (0.67–1.29) | 0.76                               | (0.55–1.04) | 0.99                               | (0.58–1.70) | 0.71                                                         | (0.52–0.97) |
|                      |               | aRR | 0.91                              | (0.65–1.28) | 0.75                               | (0.54–1.04) | 1.10                               | (0.63–1.90) | 0.71                                                         | (0.51–0.98) |
| Non-intervention FH+ | non-FB        | RR  | 0.94                              | (0.71–1.24) | 0.86                               | (0.66–1.13) | 0.65                               | (0.41–1.05) | 0.96                                                         | (0.72–1.27) |
|                      |               | aRR | 0.88                              | (0.66–1.17) | 0.82                               | (0.62–1.08) | 0.77                               | (0.48–1.24) | 1.00                                                         | (0.76–1.33) |
| Non-intervention FH- | non-FB        | RR  | 1.12                              | (0.87–1.45) | 0.94                               | (0.75–1.18) | 0.74                               | (0.49–1.10) | 0.94                                                         | (0.73–1.22) |
|                      |               | aRR | 1.14                              | (0.88–1.48) | 0.96                               | (0.76–1.21) | 0.82                               | (0.55–1.22) | 0.96                                                         | (0.74–1.24) |

RR<sup>#</sup> and adjusted RR (aRR)<sup>\*</sup> with 95%CI from GEE models. <sup>#</sup> RR of < 1 indicates a decreased relative risk of disease, that is lower incidence in the fully breastfed group than in the compared feeding group, whereas RR > 1 indicates higher incidence in fully breastfed group than in the compared formula feeding group; Bold values and bold CI were used for significant adjusted effects. <sup>\*</sup> adjusted for family history of corresponding disease, heredity of family allergy, sex, study region, siblings, parental education; Calculation on incidence was based on 2040 infants in intervention cohort, 902 in Non-intervention FH+ and 1852 in Non-intervention FH-.
